# Supplementary material for: Lycopene Protects against Smoking-Induced Lung Cancer by Inducing Base Excision Repair
Source: PubMed Central journal article supplement (PMC7402151; doi:10.3390/antiox9070643), 2020-07-21
Supplement: antioxidants-09-00643-s001.pdf [file antioxidants-09-00643-s001.pdf]

**Supplementary Table 1**

---

| <b>Gene</b>                             | <b>Forward Sequence</b> | <b>Reverse Sequence</b> |
|-----------------------------------------|-------------------------|-------------------------|
| $\beta$ -Actin                          | CTTTTCCAGCCTTCCTTCTTGG  | CAGCACTGTGTTGGCATAGAGG  |
| SR-B1                                   | GGCATTCCGATCAGTGCAACA   | AGGGTTTTGGGAGCCACGAA    |
| BCO1                                    | GGCTTAGAGCTTCCACGGGT    | GCCAGCAGTCGTCCTCTCTC    |
| BCO2                                    | TGCTGTAGGTAAGGGGAATGCT  | GTGCAACACATGGCAGACCC    |
| CD36                                    | GCGACATGATTAATGGCACA    | CCTGCAAATGTCAGAGGAAA    |
| nth like DNA<br>glycosylase 1<br>(NTH1) | AGCTGGTCAACATCCGTGCC    | TGGCTGGAGAGCATCAGTGAC   |

---
